# Supplementary material for: Construction of 3D carbon networks with well-dispersed SiOx nanodomains from gelable building blocks for lithium-ion batteries
Source: Royal Society of Chemistry journal article supplement (doi:10.1039/c9ra00139e), 2019-01-01
Supplement: c9ra00139e1.pdf [file c9ra00139e1.pdf]

## Supporting Information

### **Construction of 3D carbon networks with well-dispersed SiO<sub>x</sub> nanodomains from gelable building blocks for lithium-ion batteries**

Zhitao Lu, Ruliang Liu, Junlong Huang, Zirun Chen, Luyi Chen, Dingcai Wu, Ruowen Fu\*

*Materials Science Institute, PCFM Lab and GDHPPC Lab, School of Chemistry, Sun Yat-sen University, Guangzhou 510275, P. R. China.*

*E-mail: [cesfrw@mail.sysu.edu.cn](mailto:cesfrw@mail.sysu.edu.cn)*

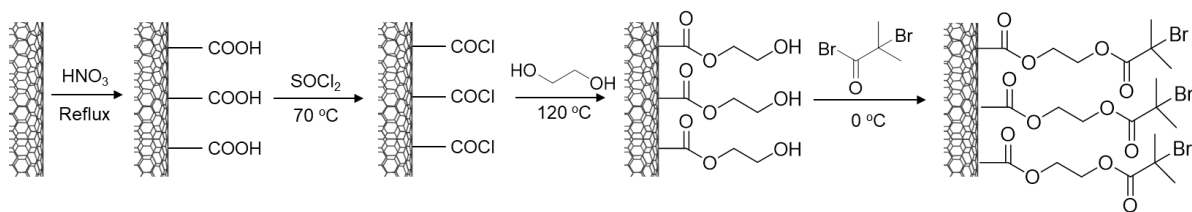

**Fig. S1** Schematic representation of the process of introduction of Br-containing surface ATRP initiation sites for CNT.

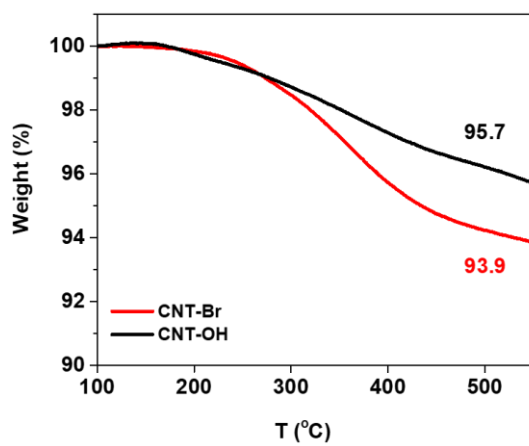

**Fig. S2** TGA curves of CNT-NH<sub>2</sub> and CNT-Br in N<sub>2</sub> flow.

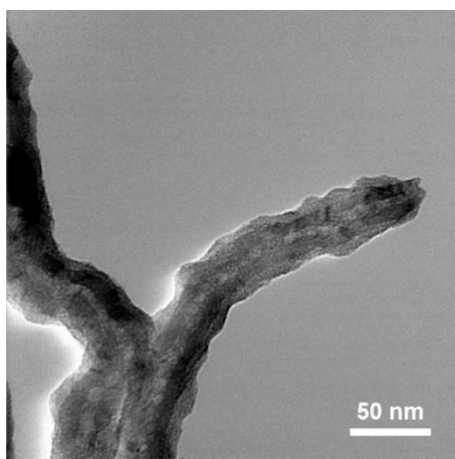

Fig. S3 TEM images of CNT-g-xPTEPM.

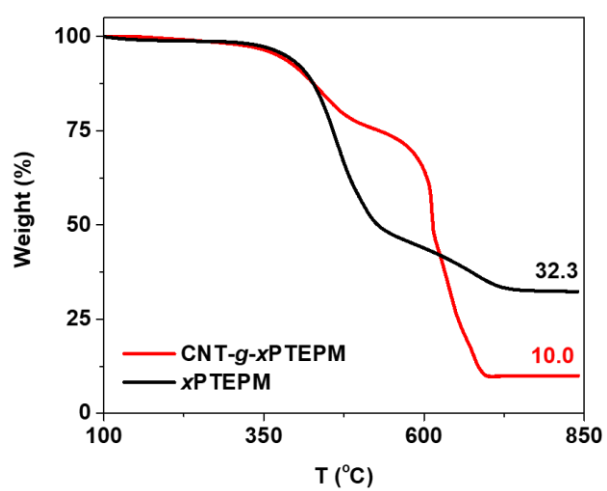

Fig. S4 TGA curves of CNT-g-xPTEPM and xPTEPM in O<sub>2</sub> flow.

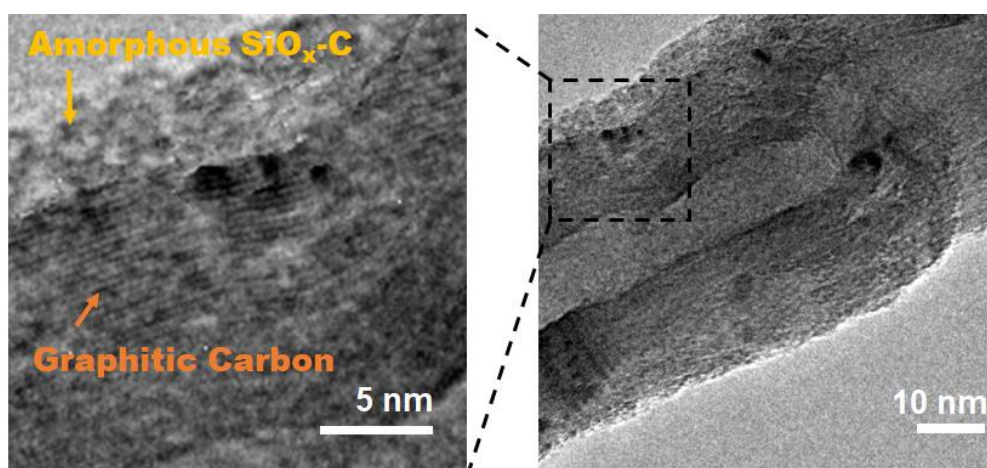

Fig.S5 High-resolution TEM image of CNT@SiO<sub>x</sub>-C.

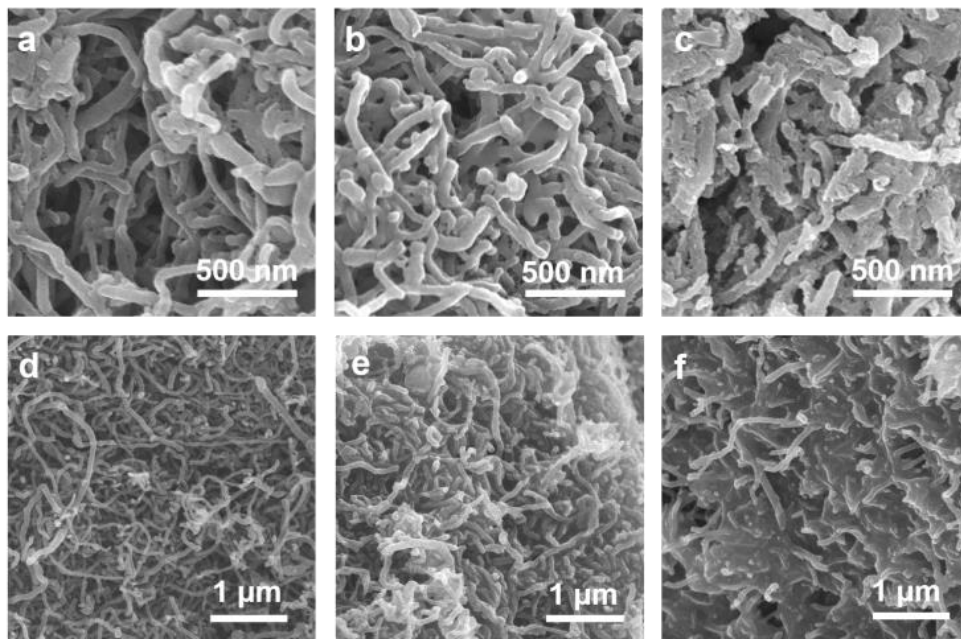

**Fig.S6** SEM images of CNT-g-xPTEPM with different polymerization time of (a) 12 h, (b) 24 h, (c) 48 h and CNT@SiO<sub>x</sub>-C with different polymerization time of (d) 12 h, (e) 24 h, (f) 48 h, respectively.

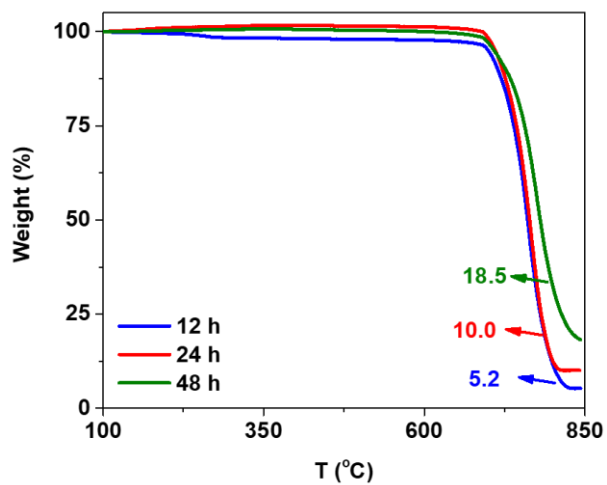

**Fig. S7** TGA curves of synthesized CNT@SiO<sub>x</sub>-C with different polymerization time.

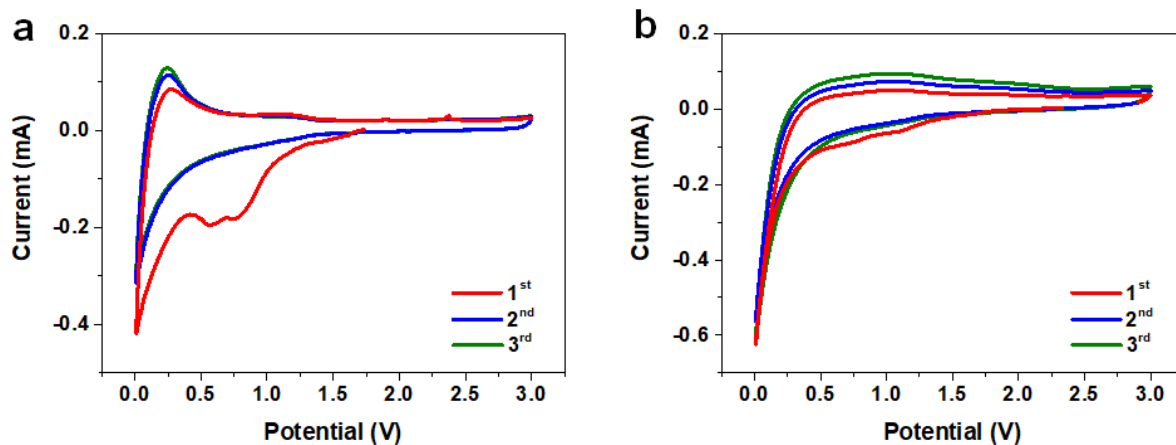

**Fig. S8** Cyclic voltammograms of a half-cell composed of (a) SiO<sub>x</sub>-C and (b) CNT vs. Li/Li<sup>+</sup> at a scan rate of 0.5 mV s<sup>-1</sup> during the first 3 cycles.

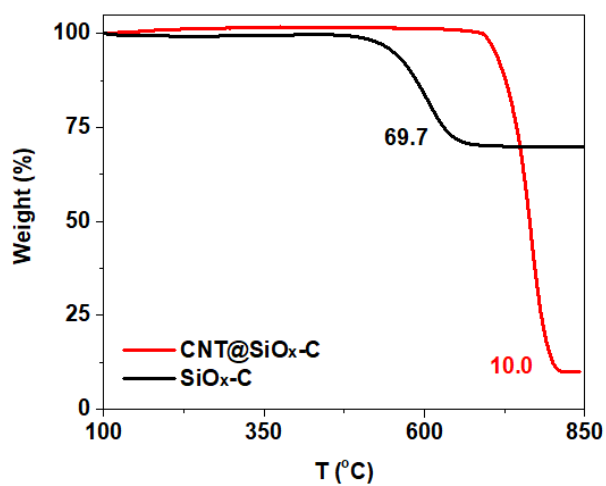

**Fig. S9** TGA curves of CNT@SiO<sub>x</sub>-C and SiO<sub>x</sub>-C in O<sub>2</sub> flow.

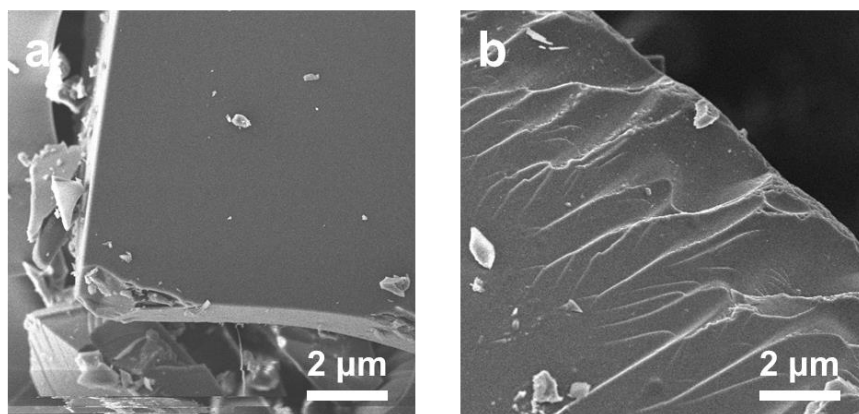

**Fig. S10** SEM images of (a) xPTEPM and (b) SiO<sub>x</sub>-C.

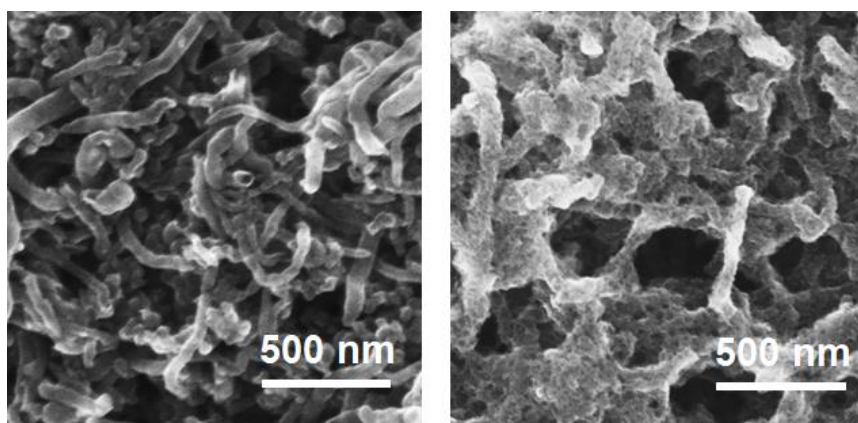

**Fig. S11** SEM images of CNT@SiO<sub>x</sub>-C electrode (a) before cycling and (b) after 50 cycles.

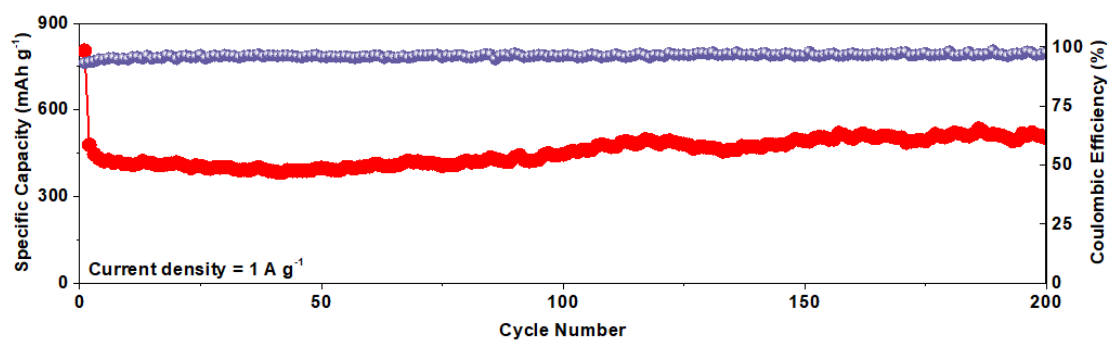

**Fig. S12** Cycling performance of CNT@SiO<sub>x</sub>-C at the current of 1 A g<sup>-1</sup>.

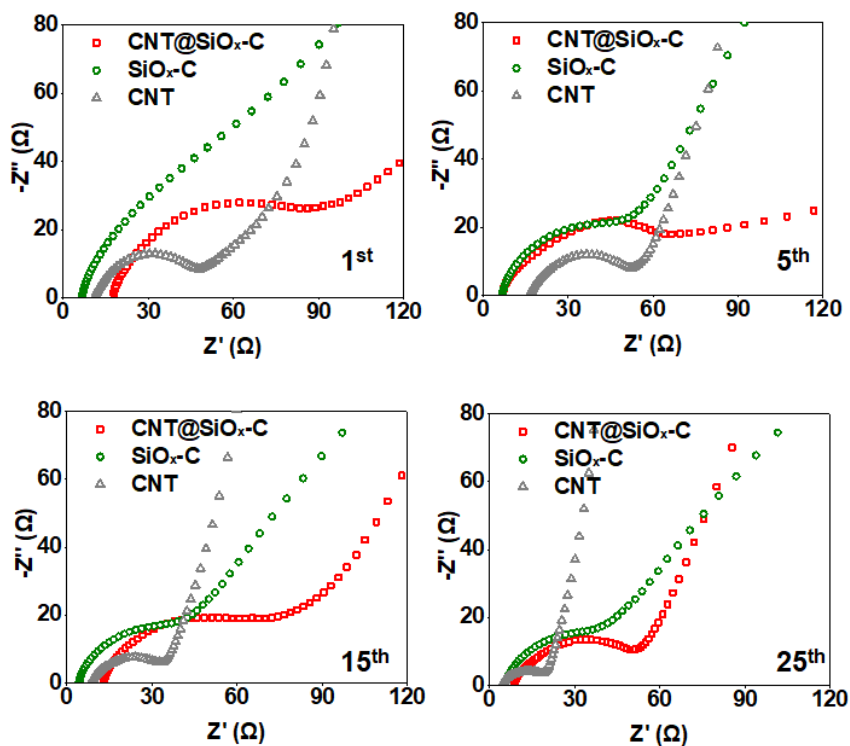

**Fig. S13** Nyquist plots of CNT@SiO<sub>x</sub>-C, SiO<sub>x</sub>-C and CNT after different cycles in the frequency range between 100 kHz and 0.01 Hz.

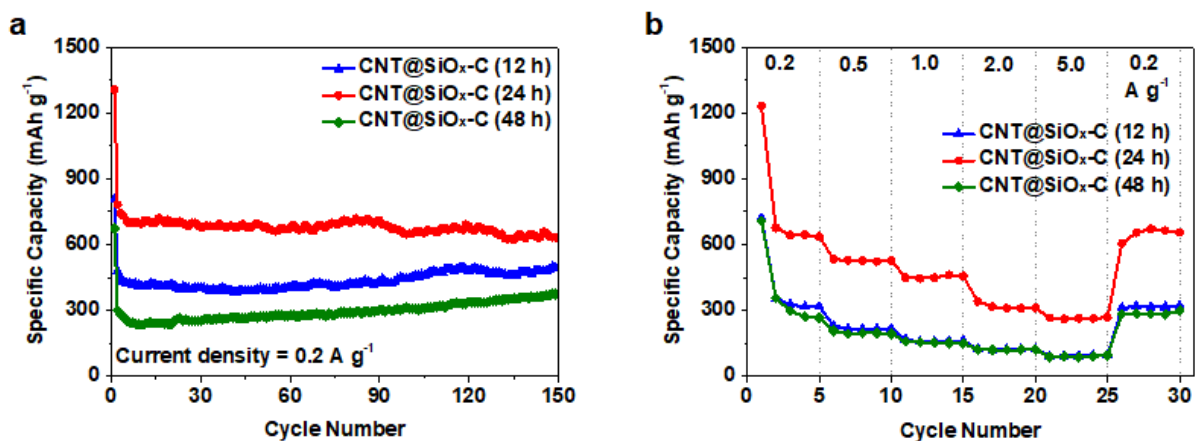

**Fig. S14** (a) Cycling performance and (b) rate performance of CNT@SiO<sub>x</sub>-C with different polymerization time in synthesis.

**Supplementary Table 1.** Electrochemical performance comparison of SiO<sub>x</sub>/C-based anode in high-energy rechargeable lithium battery reported by different research groups.

| Materials                                  | Content of SiO <sub>x</sub> (%) | Current density (mA g <sup>-1</sup> ) | Initial discharge capacity (mAh g <sup>-1</sup> ) | Reversible capacity (mAh g <sup>-1</sup> ) | Cycling number | Capacity retention (%) | References |
|--------------------------------------------|---------------------------------|---------------------------------------|---------------------------------------------------|--------------------------------------------|----------------|------------------------|------------|
| CNT@SiO <sub>x</sub> -C                    | 10.0                            | 0.2                                   | 1307                                              | 631                                        | 150            | 48.3                   | This work  |
|                                            |                                 | 0.5                                   | 813                                               | 467                                        | 400            | 89                     |            |
|                                            |                                 | 1                                     | 805.5                                             | 509                                        | 200            | 63.2                   |            |
|                                            |                                 |                                       |                                                   | 258                                        | 400            | 54                     |            |
| SiO <sub>x</sub> /C                        | 30.0                            | 0.065                                 | ~780                                              | 645                                        | 500            | 82.7                   | 1          |
| SiO <sub>2</sub> /C/CNTs                   | 67.8                            | 1                                     | ~450                                              | 315.7                                      | 1000           | 70.2                   | 2          |
|                                            |                                 | 0.05                                  | 1267.2                                            | 826.1                                      | 100            | 65.2                   |            |
| MPSiO <sub>x</sub> @rGO                    | 91.4                            | 0.1                                   | 3765                                              | 580                                        | 200            | 15.4                   | 3          |
| C/SiO <sub>x</sub>                         | 15                              | 0.2                                   | 383                                               | 290                                        | 100            | 75.7                   | 4          |
| SiO <sub>x</sub> /C/G                      | 80.5                            | 0.2                                   | 601                                               | 541                                        | 600            | 90.0                   | 5          |
| SiO/G/CNTs                                 | /                               | 0.23                                  | 790                                               | 487                                        | 130            | 61.6                   | 6          |
| SiO <sub>x</sub> @C                        | 61.6                            | 0.1                                   | ~990                                              | 563                                        | 400            | 56.9                   | 7          |
|                                            |                                 | 0.05                                  | 1160                                              | 630                                        | 150            | 54.3                   |            |
| SiO <sub>x</sub> -C                        | /                               | 0.1                                   | ~1210                                             | 674.8                                      | 100            | 55.8                   | 8          |
|                                            |                                 | 0.5                                   | ~1060                                             | 485                                        | 100            | 45.8                   |            |
| MWCNT@Si/SiO <sub>x</sub> @C               | 55                              | 0.4                                   | 1011                                              | 450                                        | 500            | 44.5                   | 9          |
| SiO <sub>x</sub> /C-2                      | 98.8                            | 0.1                                   | 1296.3                                            | 843.5                                      | 200            | 65.1                   | 10         |
| SiO <sub>x</sub> /C                        | 68.6                            | 0.1                                   | 2223.6                                            | 800                                        | 50             | 36.0                   | 11         |
| SiO <sub>x</sub> @C nanorods               | /                               | 0.1                                   | 1324                                              | 720                                        | 350            | 54.4                   | 12         |
| S-1300                                     | 73.8                            | 0.1                                   | ~960                                              | 810                                        | 100            | 84.4                   | 13         |
| SiO <sub>x</sub> /C                        | /                               | 0.1                                   | ~1380                                             | 780                                        | 350            | 56.5                   | 14         |
| SiO <sub>x</sub>                           | 100                             | 0.5                                   | ~850                                              | ~640                                       | 50             | 75.3                   | 15         |
|                                            |                                 | 0.2                                   | ~1150                                             | ~700                                       | 50             | 60.9                   |            |
|                                            |                                 | 0.1                                   | ~1290                                             | ~855                                       | 50             | 66.3                   |            |
| SiO <sub>x</sub> /SiO <sub>y</sub> Bilayer | 100                             | 0.5                                   | ~2300                                             | ~570                                       | 150            | ~24.8                  | 16         |



## References

1. Q. Xu, J. K. Sun, Y. X. Yin and Y. G. Guo, *Advanced Functional Materials*, 2018, **28**, 1705235.
2. S. Q. Wang, N. Q. Zhao, C. S. Shi, E. Z. Liu, C. N. He, F. He and L. Y. Ma, *Applied Surface Science*, 2018, **433**, 428-436.
3. D. Liu, C. R. Chen, Y. Y. Hu, J. Wu, D. Zheng, Z. Z. Xie, G. W. Wang, D. Y. Qu, J. S. Li and D. Y. Qu, *Electrochimica Acta*, 2018, **273**, 26-33.
4. T. Izawa, A. F. Arif, S. Taniguchi, K. Kamikubo, H. Iwasaki and T. Ogi, *Materials Research Bulletin*, 2019, **112**, 16-21.
5. Q. Xu, J. K. Sun, G. Li, J. Y. Li, Y. X. Yin and Y. G. Guo, *Chemical Communications*, 2017, **53**, 12080-12083.
6. Y. R. Ren, J. N. Ding, N. Y. Yuan, S. Y. Jia, M. Z. Qu and Z. L. Yu, *Journal Of Solid State Electrochemistry*, 2012, **16**, 1453-1460.
7. M. Q. Li, Y. Zeng, Y. R. Ren, C. M. Zeng, J. W. Gu, X. F. Feng and H. Y. He, *Journal of Power Sources*, 2015, **288**, 53-61.
8. W. J. Wu, J. Shi, Y. H. Liang, F. Liu, Y. Peng and H. B. Yang, *Physical Chemistry Chemical Physics*, 2015, **17**, 13451-13456.
9. Y. F. Chen, Q. A. Mao, L. Bao, T. Yang, X. X. Lu, N. Du, Y. G. Zhang and Z. G. Ji, *Ceramics International*, 2018, **44**, 16660-16667.
10. J. Y. Zhang, X. M. Zhang, C. Q. Zhang, Z. Liu, J. Zheng, Y. H. Zuo, C. L. Xue, C. B. Li and B. W. Cheng, *Energy & Fuels*, 2017, **31**, 8758-8763.
11. J. Wang, H. L. Zhao, J. C. He, C. M. Wang and J. Wang, *Journal of Power Sources*, 2011, **196**, 4811-4815.
12. Y. R. Ren and M. Q. Li, *Journal of Power Sources*, 2016, **306**, 459-466.
13. P. P. Lv, H. L. Zhao, C. H. Gao, Z. H. Du, J. Wang and X. Liu, *Journal of Power Sources*, 2015, **274**, 542-550.
14. C. H. Gao, H. L. Zhao, P. P. Lv, C. M. Wang, J. Wang, T. H. Zhang and Q. Xia, *Journal Of the Electrochemical Society*, 2014, **161**, A2216-A2221.
15. H. Guo, R. Mao, X. J. Yang and J. Chen, *Electrochimica Acta*, 2012, **74**, 271-274.
16. L. Zhang, J. W. Deng, L. F. Liu, W. P. Si, S. Oswald, L. X. Xi, M. Kundu, G. Z. Ma, T. Gemming, S. Baunack, F. Ding, C. L. Yan and O. G. Schmidt, *Advanced Materials*, 2014, **26**, 4527-4532.
